# Supplementary material for: A Cohort Study of Adult Patients with Severe Dengue in Taiwanese Intensive Care Units: The Elderly and APTT Prolongation Matter for Prognosis
Source: PubMed Central journal article supplement (PMC5245902; doi:10.1371/journal.pntd.0005270), 2017-01-06
Supplement: pntd.0005270.s006.pdf [file pntd.0005270.s006.pdf]

## **The formation of the Cox model**

Due to a limited case number, we set up the Cox model with a limited number of the variables to meet the rule of “one in ten”. Spearman's correlation matrix was constructed for all significant variables in the univariate Cox model. To avoid collinearity, only independent variables were selected. Serum creatinine and acute renal failure were highly correlated, and SOFA score and APACHE II score correlated with most variables. Thus, we did not include serum creatinine, SOFA and APACHE II scores in the final model. However, some analyses were performed to observe the changes of hazard ratio of APTT prolongation.

1. Supplementary Table 2A showed an over-adjusted model 1, which included both SOFA and APACHE II scores. As a result, the only significant variable was SOFA score.
2. Supplement Table 2B showed the model 2, which included APACHE II score. APACHE II score, cardiac arrest, and APTT prolongation were the significant variables.
3. Supplement Table 2C showed the model 3, which included SOFA score. Only gender and SOFA score achieved significance, and APTT prolongation was marginally significant ( $P= 0.053$ ).
4. Supplement Table 2D showed the model 4, which included serum creatinine and acute kidney injury at ICU admission, and was contained the least patient number because of missing data of serum creatinine. In contrast, acute kidney injury at ICU admission was a better variable than serum creatinine for inclusion in the final model.
5. Supplement Table 2E showed the model 5, which contained gender, acute kidney injury and respiratory failure at ICU admission, cardiac arrest before ICU admission, and APTT prolongation. We chose this model as the final model because these variables were mutually independent in terms of the statistics and clinical consideration.

**Supplementary Table 1: Univariate Cox regression.**

| Variables                        | Case number | HR (unadjusted)   | <i>P</i> value |
|----------------------------------|-------------|-------------------|----------------|
| Age > 70 years                   | 75          | 1.71 [0.74-3.98]  | 0.211          |
| Age (per year)                   | 75          | 1.05 [1.00-1.09]  | 0.05           |
| Male gender                      | 75          | 0.41 [0.20-0.84]  | 0.015          |
| Body weight (per kg)             | 75          | 0.97 [0.95-1.00]  | 0.066          |
| Diabetes mellitus                | 75          | 1.02 [0.50-2.09]  | 0.949          |
| Hypertension                     | 75          | 0.57 [0.27-1.17]  | 0.123          |
| Chronic kidney disease           | 75          | 1.62 [0.74-3.52]  | 0.224          |
| Chronic obstructive lung disease | 75          | 0.25 [0.03-1.80]  | 0.168          |
| Coronary artery disease          | 75          | 1.13 [0.46-2.76]  | 0.768          |
| Congestive heart failure         | 75          | 1.20 [0.36-3.96]  | 0.768          |
| Malignancy                       | 75          | 1.70 [0.70-4.18]  | 0.245          |
| Dyslipidemia                     | 75          | 1.23 [0.53-2.85]  | 0.634          |
| Stroke                           | 75          | 0.56 [0.17-1.87]  | 0.349          |
| Chronic liver disease            | 75          | 0.69 [0.16-2.93]  | 0.617          |
| APACHE II score (per point)      | 75          | 1.09 [1.06-1.12]  | <0.001         |
| APACHEII score > 24              | 75          | 4.70 [2.20-10.03] | <0.001         |
| SOFA score (per point)           | 75          | 1.26 [1.15-1.38]  | <0.001         |
| SOFA score > 15                  | 75          | 7.56 [3.65-15.64] | <0.001         |
| AKI at ICU admission             | 75          | 2.95 [1.32-6.63]  | 0.009          |
| RF at ICU admission              | 75          | 2.73 [1.12-6.67]  | 0.027          |
| CA before ICU admission          | 75          | 8.08 [3.06-21.33] | <0.001         |
| APTT > 48 seconds                | 71          | 4.54 [2.04-10.07] | <0.001         |
| APTT (per second)                | 71          | 1.07 [1.04-1.11]  | <0.001         |
| PT (per seconds)                 | 72          | 1.03 [0.98-1.08]  | 0.227          |
| Hemoglobin (g/dL)                | 75          | 0.93 [0.83-1.06]  | 0.273          |
| Hematocrit (%)                   | 75          | 0.98 [0.94-1.02]  | 0.301          |
| Platelet (x1000/dL)              | 75          | 1.00 [0.99-1.00]  | 0.214          |
| Total bilirubin (mg/dL)          | 60          | 1.07 [0.84-1.35]  | 0.604          |
| Creatinine (mg/dL)               | 72          | 1.18 [1.03-1.34]  | 0.016          |
| Creatinine > 1.5 mg/dL           | 72          | 2.52 [1.18-5.39]  | 0.017          |
| AST (U/L)                        | 71          | 1 [1-1]           | 0.275          |
| ALT (U/L)                        | 74          | 1 [1-1]           | 0.751          |

**Supplementary Table 2A:** Multivariate Cox regression model 1 included gender, APACHE II and SOFA score, acute kidney failure (AKI), respiratory failure, cardiac arrest, and APTT prolongation (n =71).

| Variables               | HR (unadjusted)   | <i>P</i> value | HR (adjusted)    | <i>P</i> value |
|-------------------------|-------------------|----------------|------------------|----------------|
| Gender (male)           | 0.41 [0.20-0.84]  | 0.015          | 0.43 [0.18-1.01] | 0.054          |
| APACHE II score > 24    | 4.70 [2.20-10.03] | <0.001         | 2.03 [0.60-6.86] | 0.254          |
| SOFA score > 15         | 7.56 [3.65-15.64] | <0.001         | 4.71 [0.60-6.86] | 0.022          |
| AKI at ICU admission    | 2.95 [1.32-6.63]  | 0.009          | 0.86 [0.26-2.80] | 0.765          |
| RF at ICU admission     | 2.73 [1.12-6.67]  | 0.027          | 1.48 [0.45-4.82] | 0.515          |
| CA before ICU admission | 8.08 [3.06-21.33] | <0.001         | 3.28 [0.92-11.7] | 0.067          |
| APTT > 48 seconds       | 4.54 [2.04-10.07] | <0.001         | 2.35 [0.99-5.58] | 0.052          |

**Supplementary Table 2B:** Multivariate Cox regression model 2 included gender, APACHE II score, acute kidney failure (AKI), respiratory failure, cardiac arrest, and APTT prolongation (n=71).

| Variables               | HR (unadjusted)   | <i>P</i> value | HR (adjusted)     | <i>P</i> value |
|-------------------------|-------------------|----------------|-------------------|----------------|
| Gender (male)           | 0.41 [0.20-0.84]  | 0.015          | 0.61 [0.27-1.39]  | 0.236          |
| APACHE II score > 24    | 4.70 [2.20-10.03] | <0.001         | 3.34 [1.25-8.91]  | 0.016          |
| AKI at ICU admission    | 2.95 [1.32-6.63]  | 0.009          | 1.42 [0.53-3.80]  | 0.49           |
| RF at ICU admission     | 2.73 [1.12-6.67]  | 0.027          | 1.84 [0.59-5.76]  | 0.295          |
| CA before ICU admission | 8.08 [3.06-21.33] | <0.001         | 5.34 [1.56-18.30] | 0.008          |
| APTT > 48 seconds       | 4.54 [2.04-10.07] | <0.001         | 3.34 [1.42-7.84]  | 0.006          |

**Supplementary Table 2C:** Multivariate Cox regression model 3 included gender, SOFA score, respiratory failure, cardiac arrest, and APTT prolongation (n=71).

| Variables               | HR (unadjusted)   | <i>P</i> value | HR (adjusted)     | <i>P</i> value |
|-------------------------|-------------------|----------------|-------------------|----------------|
| Gender (male)           | 0.41 [0.20-0.84]  | 0.015          | 0.42 [0.18-0.96]  | 0.041          |
| SOFA score > 15         | 7.56 [3.65-15.64] | <0.001         | 6.93 [2.07-23.18] | 0.002          |
| AKI at ICU admission    | 2.95 [1.32-6.63]  | 0.009          | 1.01 [0.33-3.13]  | 0.987          |
| RF at ICU admission     | 2.73 [1.12-6.67]  | 0.027          | 1.69 [0.53-5.35]  | 0.372          |
| CA before ICU admission | 8.08 [3.06-21.33] | <0.001         | 3.14 [0.90-10.96] | 0.073          |
| APTT > 48 seconds       | 4.54 [2.04-10.07] | <0.001         | 2.34 [0.99-5.53]  | 0.053          |

**Supplementary Table 2D:** Multivariate Cox regression model 4 included gender, acute kidney failure (AKI), serum creatinine, respiratory failure, cardiac arrest, and APTT prolongation (n=68).

| Variables                    | HR (unadjusted)    | <i>P</i> value | HR (adjusted)     | <i>P</i> value |
|------------------------------|--------------------|----------------|-------------------|----------------|
| Gender (male)                | 0.41 [0.20-0.84]   | 0.015          | 0.69 [0.30-1.60]  | 0.389          |
| AKI at ICU admission         | 2.95 [1.32-6.63]   | 0.009          | 4.17 [0.93-18.75] | 0.063          |
| Serum creatinine > 1.5 mg/dL | 2.52 [1.18-5.39]   | 0.017          | 0.62 [0.15-25.3]  | 0.500          |
| RF at ICU admission          | 2.73 [1.12-6.67]   | 0.027          | 3.35 [0.98-11.44] | 0.053          |
| CA before ICU admission      | 8.08 [3.06-21.33]  | <0.001         | 6.70 [1.96-22.95] | 0.002          |
| APTT > 48 seconds            | 4.5 4 [2.04-10.07] | <0.001         | 4.75 [1.86-12.11] | 0.001          |

**Supplementary Table 2E:** Multivariate Cox regression model 5 included gender, acute kidney failure (AKI), respiratory failure, cardiac arrest, and APTT prolongation (n=71).

| Variables               | HR (unadjusted)   | <i>P</i> value | HR (adjusted)     | <i>P</i> value |
|-------------------------|-------------------|----------------|-------------------|----------------|
| Gender (male)           | 0.41 [0.20-0.84]  | 0.015          | 0.66 [0.30-1.45]  | 0.298          |
| AKI at ICU admission    | 2.95 [1.32-6.63]  | 0.009          | 2.48 [1.07-5.74]  | 0.035          |
| RF at ICU admission     | 2.73 [1.12-6.67]  | 0.027          | 2.69 [0.91-7.95]  | 0.073          |
| CA before ICU admission | 8.08 [3.06-21.33] | <0.001         | 6.26 [1.91-20.54] | 0.003          |
| APTT > 48 seconds       | 4.54 [2.04-10.07] | <0.001         | 3.91 [1.69-9.07]  | 0.001          |

**Supplementary Table 3:** Spearman's correlation matrix of potential variables in the Cox regression model.

| Variables        | APACHE II score | SOFA score | Serum creatinine | Male gender | AKI    | RF     | CA     | APTT > 48 s |
|------------------|-----------------|------------|------------------|-------------|--------|--------|--------|-------------|
| APACHE II score  | 1               | 0.644*     | 0.481*           | -0.100      | 0.448* | 0.330* | 0.310* | 0.152*      |
| SOFA score       | -               | 1          | 0.449*           | -0.003      | 0.449* | 0.369* | 0.464* | 0.322*      |
| Serum creatinine | -               | -          | 1                | -0.057      | 0.757* | 0.000  | 0.234* | 0.145       |
| Gender           | -               | -          | -                | 1           | 0.047  | -0.047 | -0.216 | -0.243*     |
| AKI              | -               | -          | -                | -           | 1      | 0.128  | 0.200  | 0.144       |
| RF               | -               | -          | -                | -           | -      | 1      | 0.180  | 0.012       |
| CA               | -               | -          | -                | -           | -      | -      | 1      | 0.100       |
| APTT > 48 s      | -               | -          | -                | -           | --     | --     | --     | 1           |

\**P* value < 0.05.

**Supplementary Table 4: Receiver operating characteristic curve analysis.**

| Variables                   | AUC  | 95% CI    | <i>P</i> value |
|-----------------------------|------|-----------|----------------|
| SOFA score (per point)      | 0.85 | 0.77-0.94 | <0.001         |
| APACHE II score (per point) | 0.84 | 0.75-0.93 | <0.001         |
| APACHE II score > 24        | 0.76 | 0.64-0.88 | <0.001         |
| SOFA score > 15             | 0.76 | 0.64-0.89 | <0.001         |
| APTT (per second)           | 0.76 | 0.64-0.88 | <0.001         |
| APTT > 48 seconds           | 0.73 | 0.60-0.85 | 0.001          |
| RF at ICU admission         | 0.68 | 0.56-0.81 | 0.010          |
| AKI at ICU admission        | 0.65 | 0.52-0.78 | 0.035          |
| Creatinine (mg/dL)          | 0.64 | 0.50-0.78 | 0.053          |
| Creatinine > 1.5mg/dL       | 0.63 | 0.50-0.77 | 0.062          |
| Age (per year)              | 0.60 | 0.42-0.69 | 0.069          |
| CA before ICU admission     | 0.59 | 0.45-0.73 | 0.192          |
| Age > 70 years              | 0.56 | 0.42-0.69 | 0.069          |
| Gender (male)               | 0.37 | 0.23-0.50 | 0.068          |

**Abbreviations:**

AKI = acute kidney injury; ALT = alanine transaminase; APACHE II = acute physiology and chronic health evaluation II; APTT = activated partial thromboplastin time; RF= respiratory failure; AST = aspartate transaminase; AUC = area under curve; CA = cardiac arrest; CI = confidence interval; HR = hazard ratio; ICU= intensive care unit; PT = prothrombin time; SOFA = sequential organ failure assessment.
